# Supplementary material
Source: PubMed Central journal article supplement (PMC7967795)
Supplement: supp_t1_dez228.pdf [file supp_t1_dez228.pdf]

**Supplementary Table S1 Demographic characteristics at first cycle for women enrolled in the Environment and Reproductive Health Study (EARTH), comparison of women included and excluded in oxidative stress analysis – median (IQR) or n (%).**

|                                              | Women included<br>(n=481) | Women excluded<br>(n=225) |
|----------------------------------------------|---------------------------|---------------------------|
| Age (years)                                  | 35 (32, 38)               | 36 (32, 39)               |
| missing                                      | 0                         | 0                         |
| BMI (kg/m <sup>2</sup> )                     | 23.4 (21.2, 26.4)         | 23.5 (21.5, 26.7)         |
| missing                                      | 2                         | 3                         |
| Race                                         |                           |                           |
| White                                        | 400 (83.2)                | 183 (81.7)                |
| Black/African American                       | 13 (2.70)                 | 14 (6.25)                 |
| Asian                                        | 45 (9.36)                 | 19 (8.48)                 |
| Other                                        | 23 (4.78)                 | 8 (3.57)                  |
| missing                                      | 0                         | 1                         |
| Education                                    |                           |                           |
| <College graduate                            | 39 (9.03)                 | 10 (5.18)                 |
| ≥College graduate                            | 393 (91.0)                | 183 (94.8)                |
| missing                                      | 49                        | 32                        |
| Smoking status                               |                           |                           |
| Never                                        | 350 (72.8)                | 170 (75.9)                |
| Current                                      | 13 (2.70)                 | 4 (1.79)                  |
| Former                                       | 118 (24.5)                | 50 (22.3)                 |
| missing                                      | 0                         |                           |
| Primary infertility diagnosis at study entry |                           |                           |
| Female factor                                |                           |                           |
| Diminished ovarian reserve                   | 42 (8.73)                 | 28 (12.4)                 |
| Ovulation disorders                          | 55 (11.4)                 | 28 (12.4)                 |
| Endometriosis                                | 29 (6.03)                 | 6 (2.67)                  |
| Uterine disorders                            | 5 (1.04)                  | 4 (1.78)                  |
| Tubal factor                                 | 28 (5.82)                 | 10 (4.44)                 |
| Male factor                                  | 137 (28.5)                | 53 (23.6)                 |
| Unexplained                                  | 185 (38.5)                | 98 (42.2)                 |
| missing                                      | 0                         | 1                         |

Abbreviations: body mass index (BMI); interquartile range (IQR).
