# Supplementary material
Source: PubMed Central journal article supplement (PMC7967795)
Supplement: supp_t2_dez228.pdf [file supp_t2_dez228.pdf]

**Supplementary Table SII Adjusted<sup>a</sup> and weighted<sup>b</sup> mean proportion of cycles (95% confidence interval) resulting in implantation, clinical pregnancy, and live birth in association with urinary oxidative stress biomarkers measures among 305 women undergoing 425 IVF cycles.**

|                               | Implantation      | p-value <sup>c</sup> | Clinical pregnancy | p-value <sup>c</sup> | Live birth        | p-value <sup>c</sup> |
|-------------------------------|-------------------|----------------------|--------------------|----------------------|-------------------|----------------------|
| <b>8-iso-PGF<sub>2α</sub></b> |                   |                      |                    |                      |                   |                      |
| T1                            | 0.63 (0.53, 0.71) | 0.43                 | 0.55 (0.46, 0.64)  | 0.28                 | 0.47 (0.37, 0.56) | 0.51                 |
| T2                            | 0.68 (0.58, 0.76) |                      | 0.62 (0.53, 0.71)  |                      | 0.51 (0.42, 0.61) |                      |
| T3                            | 0.60 (0.50, 0.69) | 0.21                 | 0.53 (0.43, 0.62)  | 0.17                 | 0.47 (0.37, 0.57) | 0.57                 |
| <b>F<sub>2</sub>-IsoP-M</b>   |                   |                      |                    |                      |                   |                      |
| T1                            | 0.67 (0.58, 0.76) | 0.75                 | 0.60 (0.51, 0.68)  | 0.61                 | 0.49 (0.39, 0.58) | 0.16                 |
| T2                            | 0.65 (0.55, 0.74) |                      | 0.63 (0.54, 0.72)  |                      | 0.59 (0.48, 0.68) |                      |
| T3                            | 0.58 (0.48, 0.67) | 0.29                 | 0.47 (0.37, 0.57)  | 0.02                 | 0.38 (0.29, 0.48) | p<0.01               |

<sup>a</sup>Adjusted for maternal age (continuous), BMI (continuous), smoking (never vs. ever), primary infertility dx (male, female, unexplained), race (white vs. other).

<sup>b</sup>Models were weighted to account for number of cycles with weights assigned using inverse number of cycles.

<sup>c</sup>p-value represents differences compared to the 2<sup>nd</sup> tertile.

Note: 1 woman was excluded due to missing BMI information.

Abbreviations: 8-isoprostane-PGF<sub>2α</sub> (8-iso-PGF<sub>2α</sub>); 8-isoprostane-PGF<sub>2α</sub> metabolite (F<sub>2</sub>-isoP-M); in-vitro fertilization (IVF).
