# Supplementary material
Source: PubMed Central journal article supplement (PMC7967795)
Supplement: supp_t3_dez228.pdf [file supp_t3_dez228.pdf]

**Supplementary Table SIII Adjusted<sup>a</sup> and weighted<sup>b</sup> mean proportion of cycles (95% CI) resulting in implantation, clinical pregnancy, and live birth in association with urinary oxidative stress among 262 women undergoing 568 IUI cycles.**

|                               | Implantation      | p-value <sup>c</sup> | Clinical pregnancy | p-value <sup>c</sup> | Live birth        | p-value <sup>c</sup> |
|-------------------------------|-------------------|----------------------|--------------------|----------------------|-------------------|----------------------|
| <b>8-iso-PGF<sub>2α</sub></b> |                   |                      |                    |                      |                   |                      |
| T1                            | 0.26 (0.18, 0.35) | 0.91                 | 0.24 (0.17, 0.34)  | 0.99                 | 0.22 (0.14, 0.32) | 0.87                 |
| T2                            | 0.26 (0.19, 0.36) |                      | 0.24 (0.17, 0.34)  |                      | 0.21 (0.13, 0.31) |                      |
| T3                            | 0.26 (0.18, 0.35) | 0.94                 | 0.20 (0.13, 0.29)  | 0.46                 | 0.13 (0.08, 0.21) | 0.16                 |
| <b>F<sub>2</sub>-IsoP-M</b>   |                   |                      |                    |                      |                   |                      |
| T1                            | 0.23 (0.15, 0.32) | 0.11                 | 0.20 (0.13, 0.29)  | 0.07                 | 0.17 (0.10, 0.26) | 0.10                 |
| T2                            | 0.33 (0.24, 0.43) |                      | 0.31 (0.22, 0.41)  |                      | 0.27 (0.18, 0.38) |                      |
| T3                            | 0.23 (0.16, 0.33) | 0.15                 | 0.19 (0.12, 0.29)  | 0.08                 | 0.13 (0.08, 0.22) | 0.03                 |

<sup>a</sup>Adjusted for maternal age (continuous), BMI (continuous), smoking (never vs. ever), primary infertility dx (male, female, unexplained), race (white vs. other).

<sup>b</sup>Models were weighted to account for number of cycles with weights assigned using inverse number of cycles.

<sup>c</sup>p-value represents differences in adjusted mean proportion compared to the 2<sup>nd</sup> tertile.

Note: 2 women were excluded due to missing information on BMI and exposure.

Abbreviations: 8-isoprostane-PGF<sub>2α</sub> (8-iso-PGF<sub>2α</sub>); 8-isoprostane-PGF<sub>2α</sub> metabolite (F<sub>2</sub>-isoP-M); intrauterine insemination (IUI).
