# Supplementary material
Source: PubMed Central journal article supplement (PMC7967795)
Supplement: supp_t4_dez228.pdf [file supp_t4_dez228.pdf]

**Supplementary Table SIV Adjusted<sup>a</sup> and weighted<sup>b</sup> mean proportion of cycles (95% confidence interval) resulting in implantation, clinical pregnancy, and live birth in association with urinary oxidative stress biomarkers among 167 men with partners undergoing 240 IVF cycles.**

|                               | Implantation      | p-value <sup>c</sup> | Clinical pregnancy | p-value <sup>c</sup> | Live birth        | p-value <sup>c</sup> |
|-------------------------------|-------------------|----------------------|--------------------|----------------------|-------------------|----------------------|
| <b>8-iso-PGF<sub>2α</sub></b> |                   |                      |                    |                      |                   |                      |
| T1                            | 0.64 (0.52, 0.75) | 0.33                 | 0.57 (0.45, 0.68)  | 0.26                 | 0.54 (0.41, 0.66) | 0.96                 |
| T2                            | 0.72 (0.60, 0.82) |                      | 0.67 (0.54, 0.78)  |                      | 0.53 (0.41, 0.66) |                      |
| T3                            | 0.67 (0.53, 0.78) | 0.55                 | 0.57 (0.44, 0.70)  | 0.30                 | 0.45 (0.32, 0.59) | 0.43                 |
| <b>F<sub>2</sub>-IsoP-M</b>   |                   |                      |                    |                      |                   |                      |
| T1                            | 0.71 (0.59, 0.80) | 0.90                 | 0.63 (0.52, 0.73)  | 0.86                 | 0.60 (0.48, 0.71) | 0.36                 |
| T2                            | 0.72 (0.60, 0.81) |                      | 0.62 (0.49, 0.73)  |                      | 0.52 (0.39, 0.64) |                      |
| T3                            | 0.62 (0.49, 0.74) | 0.26                 | 0.57 (0.43, 0.69)  | 0.55                 | 0.42 (0.29, 0.55) | 0.30                 |

<sup>a</sup>Adjusted for paternal age (continuous), BMI (continuous), smoking (never vs. ever), primary infertility dx (male, female, unexplained), and race (white vs. other).

<sup>b</sup>Models were weighted to account for number of cycles with weights assigned using inverse number of cycles.

<sup>c</sup>p-value represents differences in adjusted mean proportion compared to the 2<sup>nd</sup> tertile.

Abbreviations: 8-isoprostane-PGF<sub>2α</sub> (8-iso-PGF<sub>2α</sub>); 8-isoprostane-PGF<sub>2α</sub> metabolite (F<sub>2</sub>-isoP-M); in-vitro fertilization (IVF).
