# Supplementary material
Source: PubMed Central journal article supplement (PMC7967795)
Supplement: supp_t5_dez228.pdf [file supp_t5_dez228.pdf]

**Supplementary Table SV Adjusted<sup>a</sup> and weighted<sup>b</sup> mean proportion of cycles (95% confidence interval) resulting in implantation, clinical pregnancy, and live birth in association with urinary oxidative stress biomarkers among 120 men with partners undergoing 230 IUI cycles.**

|                               | Implantation      | p-value <sup>c</sup> | Clinical pregnancy | p-value <sup>c</sup> | Live birth        | p-value <sup>c</sup> |
|-------------------------------|-------------------|----------------------|--------------------|----------------------|-------------------|----------------------|
| <b>8-iso-PGF<sub>2α</sub></b> |                   |                      |                    |                      |                   |                      |
| T1                            | 0.32 (0.19, 0.48) | 0.61                 | 0.31 (0.18, 0.48)  | 0.54                 | 0.27 (0.15, 0.44) | 0.46                 |
| T2                            | 0.27 (0.16, 0.41) |                      | 0.25 (0.15, 0.40)  |                      | 0.19 (0.10, 0.35) |                      |
| T3                            | 0.26 (0.15, 0.41) | 0.91                 | 0.22 (0.12, 0.36)  | 0.74                 | 0.16 (0.08, 0.31) | 0.71                 |
| <b>F<sub>2</sub>-IsoP-M</b>   |                   |                      |                    |                      |                   |                      |
| T1                            | 0.29 (0.17, 0.45) | 0.61                 | 0.28 (0.15, 0.45)  | 0.58                 | 0.24 (0.13, 0.40) | 0.31                 |
| T2                            | 0.24 (0.14, 0.38) |                      | 0.23 (0.13, 0.37)  |                      | 0.14 (0.06, 0.30) |                      |
| T3                            | 0.31 (0.18, 0.47) | 0.53                 | 0.27 (0.15, 0.43)  | 0.65                 | 0.24 (0.12, 0.40) | 0.34                 |

<sup>a</sup>Adjusted for paternal age (continuous), BMI (continuous), smoking (never vs. ever), primary infertility dx (male, female, unexplained), and race (white vs. other).

<sup>b</sup>Models were weighted to account for number of cycles with weights assigned using inverse number of cycles.

<sup>c</sup>p-value represents differences in adjusted mean proportion compared to the 2<sup>nd</sup> tertile.

Note: 1 man was missing information on age. 1 man was missing information on cycle outcome.

Abbreviations: 8-isoprostane-PGF<sub>2α</sub> (8-iso-PGF<sub>2α</sub>); 8-isoprostane-PGF<sub>2α</sub> metabolite (F<sub>2</sub>-isoP-M); intrauterine insemination (IUI).
